# Supplementary material for: ADME profiling, molecular docking, DFT, and MEP analysis reveal cissamaline, cissamanine, and cissamdine from Cissampelos capensis L.f. as potential anti-Alzheimer's agents
Source: Royal Society of Chemistry journal article supplement (doi:10.1039/d4ra01070a), 2024-01-01
Supplement: d4ra01070a1.pdf [file d4ra01070a1.pdf]

## Supplementary Materials

### ADME Profiling, Molecular Docking, DFT, and MEP Analysis Reveal Cissamaline, Cissamanine, and Cissamdine from *Cissampelos capensis* L.f. as Potential Anti-Alzheimer Agents

Maram B. Alhawarri<sup>\*a</sup>, Mohammad G. Al-Thiabat<sup>b</sup>, Amit Dubey<sup>c,d</sup>, Aisha Tufail<sup>d</sup>, Dania Fouad<sup>e</sup>, Bilal Harieth Alrimawif, and Mohamad Dayoob<sup>f</sup>

<sup>a</sup>Department of Pharmacy, Faculty of Pharmacy, Jadara University, P.O.Box 733, Irbid 21110, Jordan. [m.hawarri@jadara.edu.jo](mailto:m.hawarri@jadara.edu.jo)

<sup>b</sup>School of Pharmaceutical Sciences, Universiti Sains Malaysia, Gelugor 11800, Penang, Malaysia. [Mohd.althiabat@gmail.com](mailto:Mohd.althiabat@gmail.com)

<sup>c</sup>Department of Pharmacology, Saveetha Dental College and Hospital, Saveetha Institute of Medical and Technical Sciences, Chennai-600077, Tamil Nadu, India. [ameetbioinfo@gmail.com](mailto:ameetbioinfo@gmail.com)

<sup>d</sup>Computational Chemistry and Drug Discovery Division, Quanta Calculus, Greater Noida-201310, Uttar Pradesh, India. [aishatufailansari@gmail.com](mailto:aishatufailansari@gmail.com)

<sup>e</sup>Faculty of Dentistry, Ibn Sina University for Medical and Pharmaceutical Sciences, Baghdad, Iraq. [daniaalsafar2009@gmail.com](mailto:daniaalsafar2009@gmail.com)

<sup>f</sup>Michael Sayegh Faculty of Pharmacy, Aqaba University of Technology, Aqaba, Jordan. [brimawi@aut.edu.jo](mailto:brimawi@aut.edu.jo)

<sup>g</sup>Faculty of Pharmacy, MAHSA University, Jenjarom, Malaysia. [mohamaddayoob@mahsa.edu.my](mailto:mohamaddayoob@mahsa.edu.my)

#### \*Corresponding authors

Dr. Maram B. Alhawarri

Department of Pharmacy

Faculty of Pharmacy

Jadara University

Irbid 21110, Jordan

E-mail: [m.hawarri@jadara.edu.jo](mailto:m.hawarri@jadara.edu.jo)

**Table S1.** Grid box coordinates of protein-ligand interactions as determined by co-crystallized inhibitors.

| Crystal structure | Grid box size | Active binding sites coordinate (xyz-coordinates) |         |        |
|-------------------|---------------|---------------------------------------------------|---------|--------|
|                   |               | X                                                 | Y       | Z      |
| ACE-1O86          | 40*40*40      | 40.553                                            | 32.798  | 47.286 |
| BACE1-4DJU        | 40*40*40      | 21.029                                            | 11.195  | 21.798 |
| GSK3-1Q5K         | 40*40*40      | 23.148                                            | 22.189  | 9.398  |
| TACE-3G42         | 40*40*40      | 52.568                                            | 33.061  | 104.89 |
| AChE-4M0E         | 40*40*40      | -17.171                                           | -42.504 | 25.612 |
| GS-7D8X           | 40*40*40      | 164.22                                            | 174.11  | 148.43 |

**Table S2.** Predicted cytochrome (CYP) enzyme inhibition properties of cissamaline, cissamanine, and cissamdine utilizing the SwissADME web service.

| Property          | Model Name        | Predicted Value |             |            |
|-------------------|-------------------|-----------------|-------------|------------|
|                   |                   | Cissamaline     | Cissamanine | Cissamdine |
| <b>Metabolism</b> | CYP1A2 substrate  | No              | No          | No         |
|                   | CYP2C19 substrate | No              | No          | No         |
|                   | CYP2C9 substrate  | No              | No          | No         |
|                   | CYP2D6 substrate  | No              | No          | No         |
|                   | CYP3A4 inhibitor  | No              | No          | No         |

**Table S3.** Density Function Theory calculations with other descriptors.

| Name               | Total energy | Binding Energy | HOMO Energy | LUMO Energy | Band Gap Energy | Dipole moment | Hardness ( $\eta$ ) | Softness (S) | Electro-philicity ( $\omega$ ) | Electronegativity ( $\chi$ ) |
|--------------------|--------------|----------------|-------------|-------------|-----------------|---------------|---------------------|--------------|--------------------------------|------------------------------|
| <b>Cissamdine</b>  | -971.544     | -8.58034       | -0.171744   | -0.0952612  | 0.0764825       | 1.86533       | 0.0382              | 26.15        | 46.00                          | 0.1335                       |
| <b>Cissamaline</b> | -1,009.32    | -8.89957       | -0.182999   | -0.102772   | 0.0802274       | 2.95921       | 0.0406              | 24.61        | 137.11                         | 0.1429                       |
| <b>Cissamanine</b> | -1,045.05    | -8.52111       | -0.184059   | -0.100964   | 0.0830954       | 2.97755       | 0.0415              | 24.07        | 108.75                         | 0.1425                       |

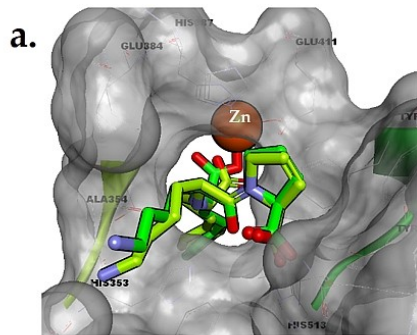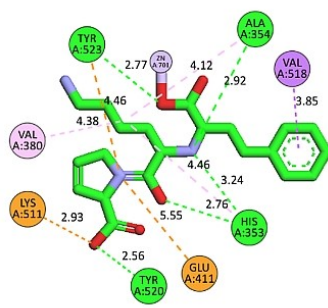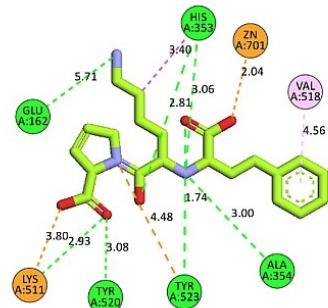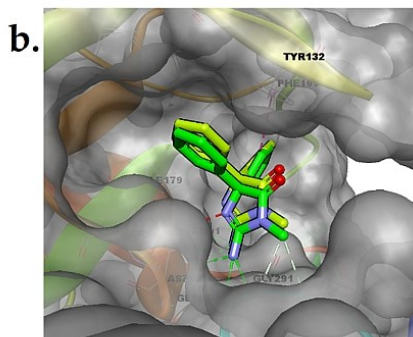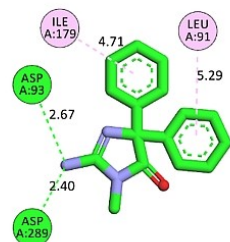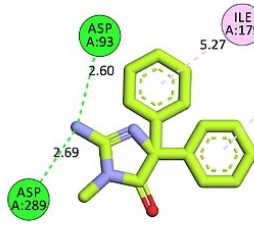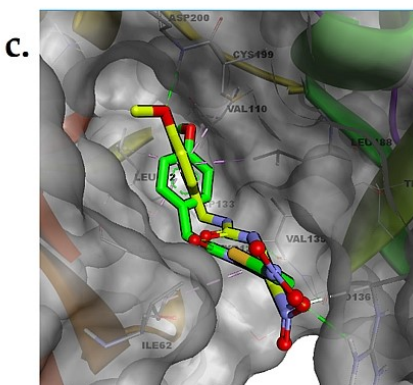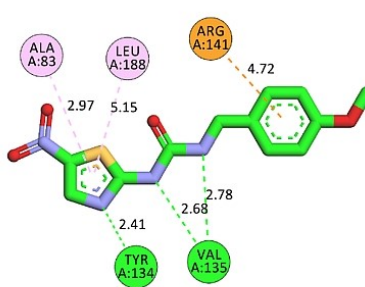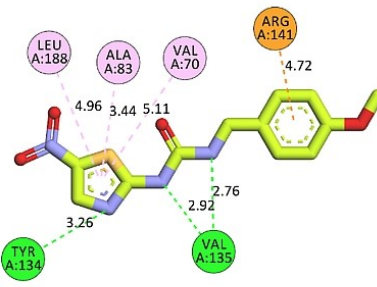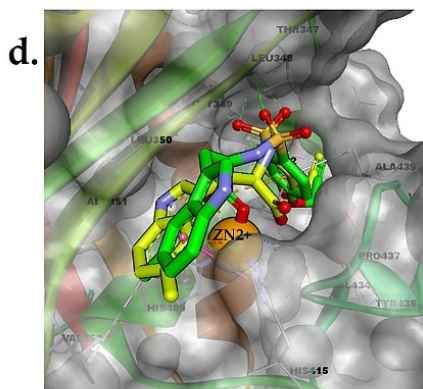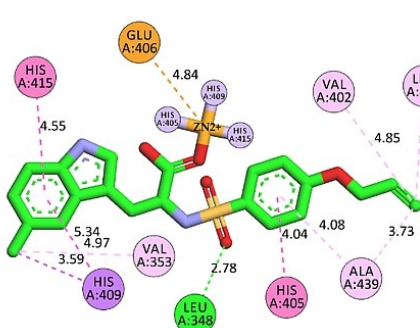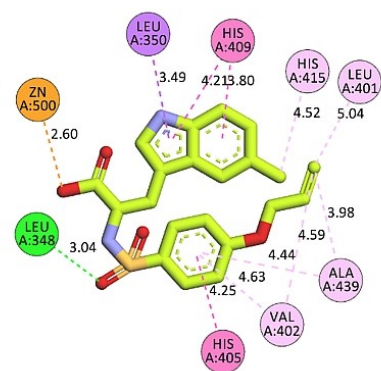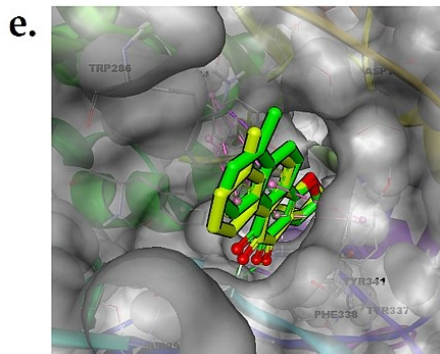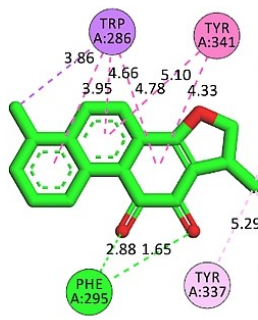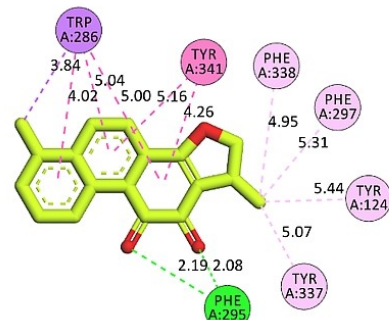

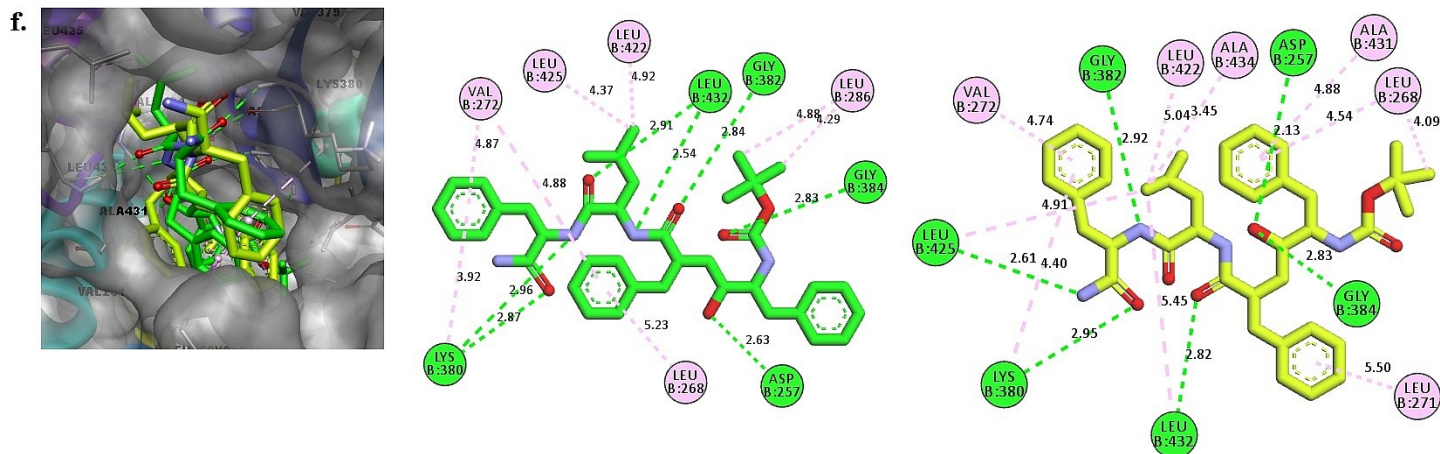

**Figure S1.** Superimposition and 2D interactions analysis of the co-crystallized ligand (green C, red O, and blue N) and re-docked ligand (lime C, red O, and blue N). (a) The crystal structure of human angiotensin converting enzyme (ACE) in complex with the co-crystallized ligand (Lisinopril) (1O86.pdb). (b) The crystal structure of human  $\beta$ -site APP cleaving enzyme 1 (BACE1) in complex with the co-crystallized ligand (2-imino-3-methyl-5,5-diphenylimidazolidin-4-one) (4DJU.pdb). (c) The crystal structure of human glycogen synthase kinase-3 (GSK-3) in complex with the co-crystallized ligand (AR-A014418) (1Q5K.pdb). (d) The crystal structure of human TNF- $\alpha$  converting enzyme (TACE) in complex with the co-crystallized ligand (2R)-2-[(4-but-2-ynoxypheyl)sulfonylamino]-3-(5-methyl-1H-indol-3-yl)propanoic acid (3G42.pdb). (e) The crystal structure of human acetylcholinesterase (AChE) in complex with the co-crystallized ligand (Dihydrotanshinone I) (4M0E.pdb). (f) The crystal structure of the human gamma-secretase (GS) complex in complex with the co-crystallized ligand (L-685458) (PDB ID: 7D8X).

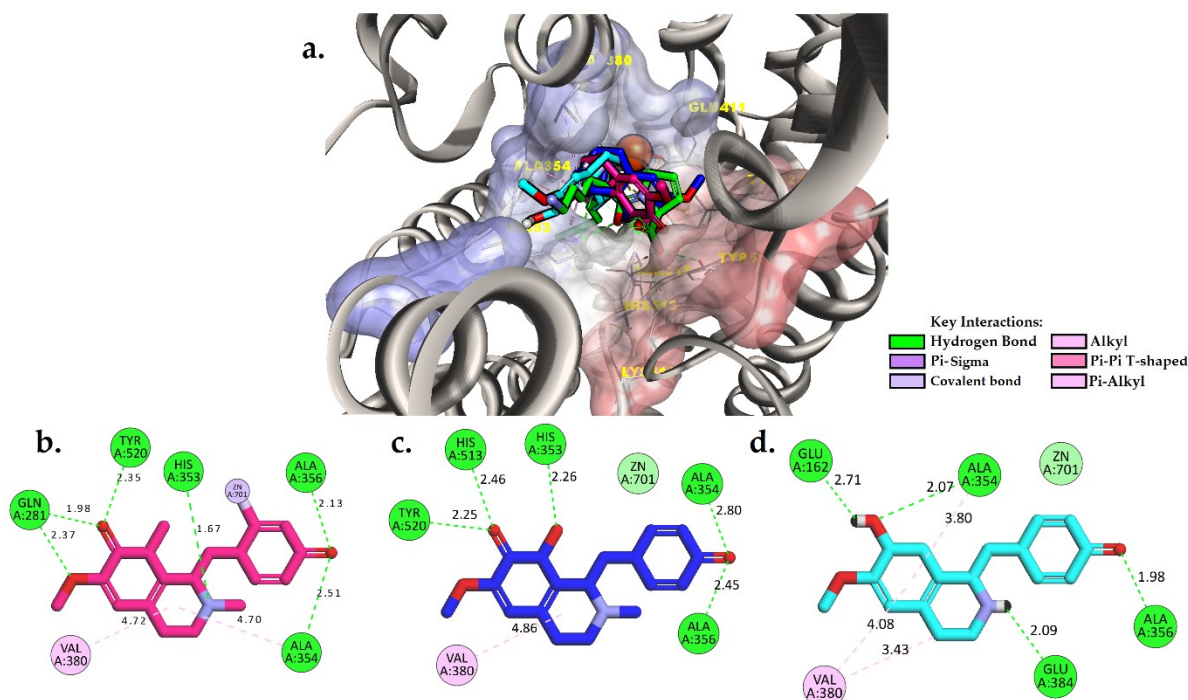

**Figure S2.** 3D binding pose interactions between lisinopril (green C, red O, pale blue N), cissamaline (pink C, red O, pale blue N), cissamanine (blue C, red O, pale blue N), and cissamdine (cyan C, red O, pale blue N) and angiotensin converting enzyme (ACE) (a). 2D interaction analysis of cissamaline (b), cissamanine (c), and cissamdine (d) docked in the active binding site of ACE, represented by a solid surface rendering with pKa color-coding. ACE (PDB ID: 1O86) is shown as a gray ribbon.

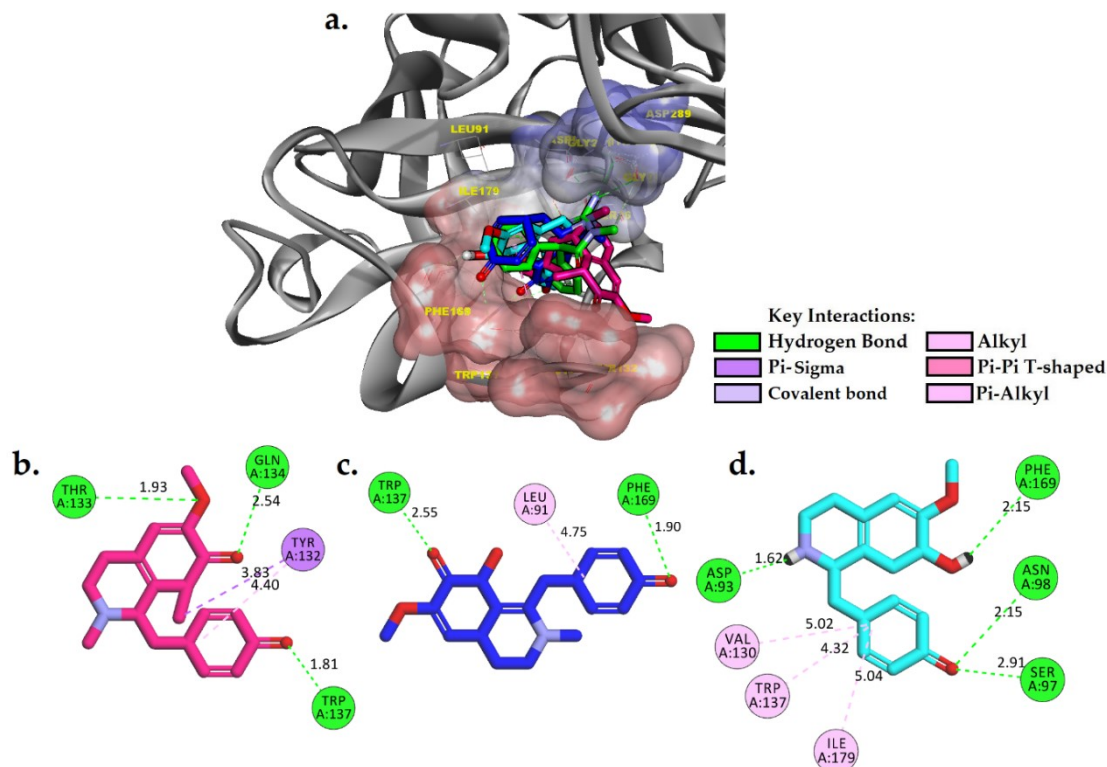

**Figure S3.** 3D binding poses interactions between 2-imino-3-methyl-5,5-diphenylimidazolidin-4-one (green C, red O, pale blue N), cissamaline (pink C, red O, pale blue N), cissamanine (blue C, red O, pale blue N), and cissamdine (cyan C, red O, pale blue N) and  $\beta$ -site APP cleaving enzyme 1 (BACE1) (a). 2D interaction analysis of cissamaline (b), cissamanine (c), and cissamdine (d) docked in the active binding site of BACE1, represented by a solid surface rendering with pKa color-coding. BACE1 (PDB ID: 4DJU) is shown as a gray ribbon.

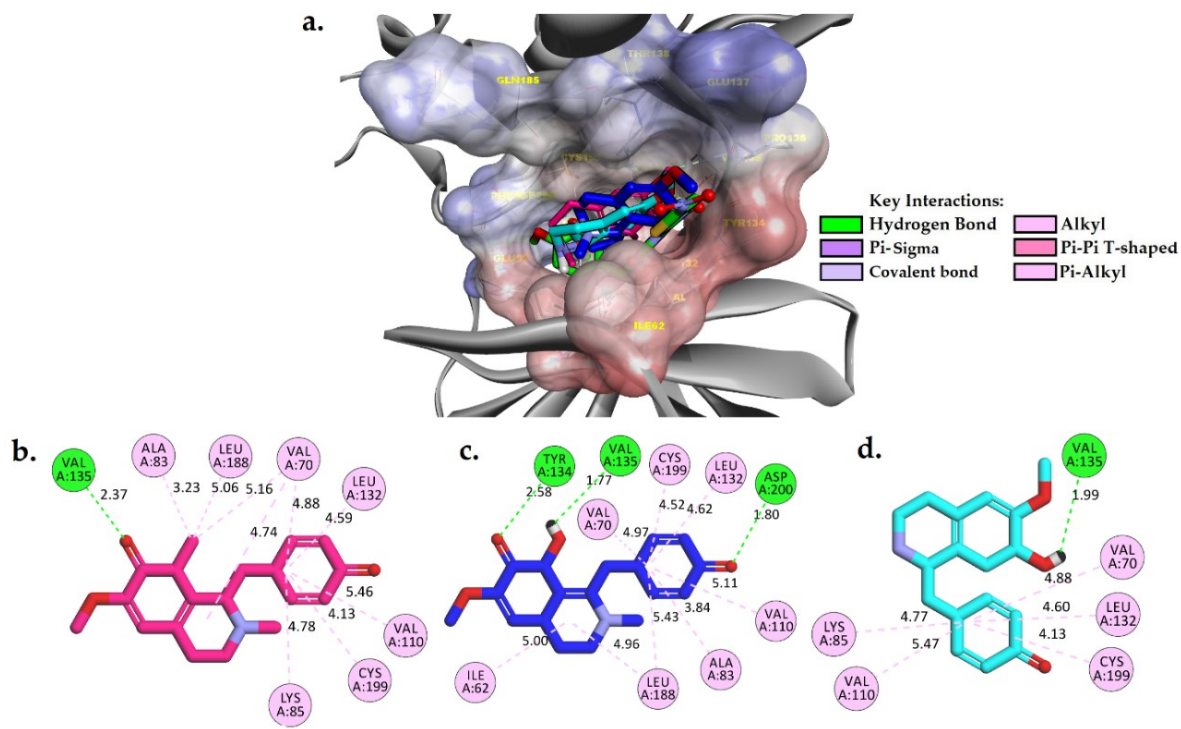

**Figure S4.** 3D binding poses interactions between AR-A014418 (green C, red O, pale blue N), cissamaline (pink C, red O, pale blue N), cissamanine (blue C, red O, pale blue N), and cissamdine (cyan C, red O, pale blue N) and Glycogen Synthase Kinase-3 $\beta$  (GSK-3 $\beta$ ) (a). 2D interaction analysis of cissamaline (b), cissamanine (c), and cissamdine (d) docked in the active binding site of GSK-3 $\beta$ , represented by a solid surface rendering with pKa color-coding. BACE1 (PDB ID: 4DJU) is shown as a gray ribbon.

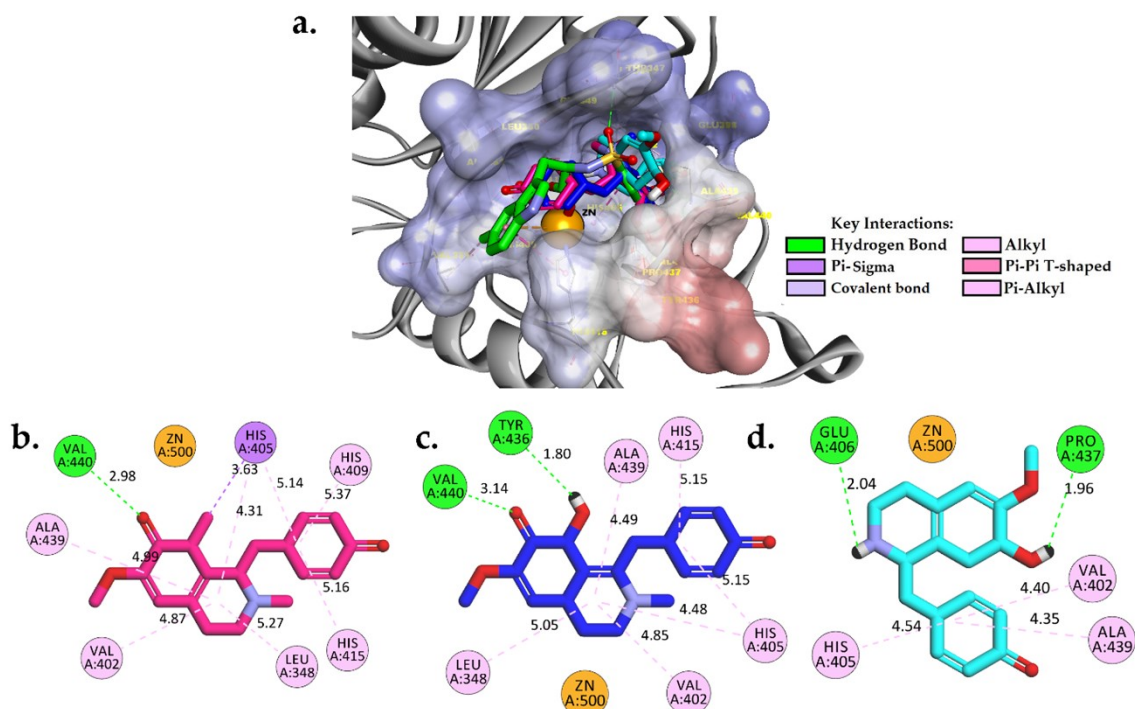

**Figure S5.** 3D binding poses interactions between (2R)-2-[(4-but-2-ynoxophenyl)sulfonylamino]-3-(5-methyl-1H-indol-3-yl)propanoic acid (green C, red O, pale blue N), cissamaline (pink C, red O, pale blue N), cissamanine (blue C, red O, pale blue N), and cissamdine (cyan C, red O, pale blue N) and TACE (a). 2D interaction analysis of cissamaline (b), cissamanine (c), and cissamdine (d) docked in the active binding site of TACE, represented by a solid surface rendering with pKa color-coding. TACE (PDB ID: 3G42) is shown as a gray ribbon.

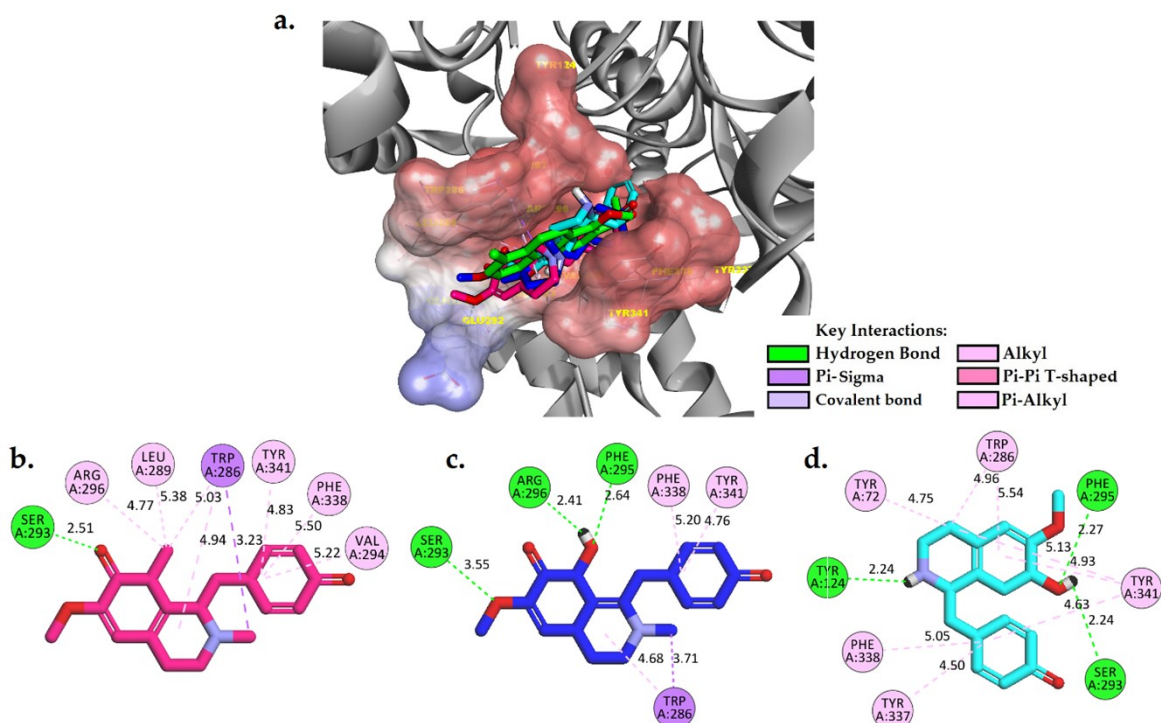

**Figure S6.** 3D binding poses interactions between Dihyrotanshinone I (green C, red O, pale blue N), cissamaline (pink C, red O, pale blue N), cissamanine (blue C, red O, pale blue N), and cissamdine (cyan C, red O, pale blue N) and AChE (a). 2D interaction analysis of cissamaline (b), cissamanine (c), and cissamdine (d) docked in the active binding site of AChE, represented by a solid surface

rendering with pKa color-coding. AChE (PDB ID: 4M0E) is shown as a gray ribbon.

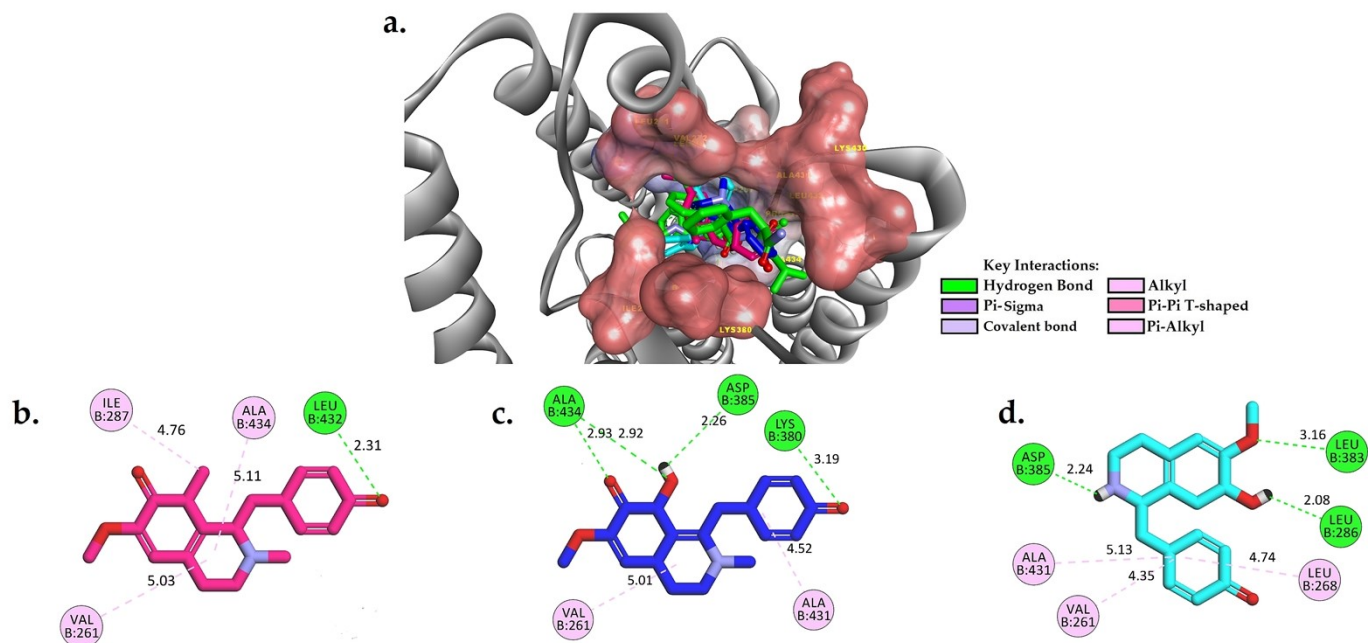

**Figure S7.** 3D binding poses interactions between L-685458 (green C, red O, pale blue N), cissamaline (pink C, red O, pale blue N), cissamanine (blue C, red O, pale blue N), and cissamdine (cyan C, red O, pale blue N) and gamma-secretase (GS) (a). 2D interaction analysis of cissamaline (b), cissamanine (c), and cissamdine (d) docked in the active binding site of GS, represented by a solid surface rendering with pKa color-coding. GS (PDB ID: 7D8X) is shown as a gray ribbon.
